# Supplementary material
Source: publisher figshare collection journal article supplement (https://sage.figshare.com/ndownloader/files/18109784)
Supplement: Supplementary file 1 [file 18109784]

**Online Supplement**

**APPENDIX A**

Full List of References in Review

Abdukadir, G. 1992. Liquidity constraints as a cause of moonlighting. *Applied Economics, 24*: 1307 – 1310.

Alden, J. 1982. A comparative analysis of moonlighting in Great Britain and the USA. *Industrial Relations Journal, 13*: 21 – 31.

Allen, W. D. 1998. The moonlighting decision of unmarried men and women: Family and labor market influences. *Atlantic Economic Journal, 26*: 190 – 205.

Amuedo-Dorantes, C., & Kimmel, J. 2009. Moonlighting over the business cycle. *Economic Inquiry, 47*: 754 – 765.

Arcuri, A. F., Gunn, M. M., & Lester, D. 1987. Moonlighting police officers: A way of life. *Psychological Reports, 60*: 210.

Arnold, F., Kauder, B., Potrafke, N. 2014. Outside earnings, absence, and activity: Evidence from German Parliamentarians. *European Journal of Political Economy, 36*: 147 – 157.

Arora, N. 2013. Analyzing moonlighting as HR retention policy: A new trend. *Journal of Commerce & Management Thought IV, 4*: 329 – 338.

Atherton, A., Faria, J. R., Wheatley, D., Wu, D., & Wu, Z. 2016. The decision to moonlight: Does second job holding by the self-employed and employed differ? *Industrial Relations Journal, 47*: 279 – 299.

Averett, S. L. 2001. Moonlighting: Multiple motives and gender differences. *Applied Economics, 33*: 1391 – 1410.

Baah-Boateng, W., Adjei, P., & Oduro, A. D. 2013. Determinants of moonlighting in Ghana: an empirical investigation. *African Review of Economics and Finance, 4*: 176 – 202.

Baba, V. V., & Jamal, M. 1992. How much do we really know about moonlighters? *Public Personnel Management, 21*: 65 – 73.

Ballou, D. 1995. Causes and consequences of teacher moonlighting. *Education Economics, 3*: 3 – 18.

Bamberry, L., & Campbell, I. 2012. Multiple job holders in Australia: Motives and personal impact. *Australian Bulletin of Labour, 38*: 293 – 314.

Banerjee, S. (2012). Effect of Employee Moonlighting: A Challenging Task for Managers and Organisations. *International Journal of Management Research & Business Strategy, 1*: 95 – 100.

Bazzoli, G. J., & Culler, S. D. 1986. Factors affecting residents' decisions to moonlight. *Journal of Medical Education, 61*: 797 – 802.

Bell, D., & Roach, P. B. 1990. Moonlighting: The economic reality of teaching. *Education, 110*: 397 – 400.

Bennett, N., Carson, P. P., Carson, K. D., & Blum, T. C. 1994. A comparison of “traditional” and “atypical” workers: Demographic, behavioral, and attitudinal differences. *Journal of Business and Psychology, 8*: 467 – 474.

Benson, N. M., & Beach, S. R. (2019). After hours: A survey of moonlighting practices in psychiatry residents. *Academic Psychiatry, 43*: 18 – 22.

Bertolini, S., & Vallero,, M. 2010. Career patterns in the artistic labour market: multiple job holding and informal professional networks (No. 201025). University of Turin.

Betts, S. C. 2002. *An exploration of multiple jobholding (moonlighting) and an investigation into the relationship between multiple jobholding and work related commitment*. Unpublished doctoral dissertation, Rutgers University.

Betts, S. C. 2004. Gender differences in multiple jobholding: moonlighting among teachers. *Journal of Business & Economic Research, 2*: 25 – 34.

Betts, S. C. 2006. The decision to moonlight or quit: incorporating multiple jobholding into a model of turnover. *Journal of Organizational Culture, Communications and Conflict, 10*: 63 – 78.

Biglaiser, G., & Albert Ma, C. T. 2007. Moonlighting: public service and private practice. *The RAND Journal of Economics, 38*: 1113 – 1133.

Bögenhold, D. 2019. From Hybrid Entrepreneurs to Entrepreneurial Billionaires: Observations on the Socioeconomic Heterogeneity of Self-employment. *American Behavioral Scientist, 63*: 129 – 146.

Bögenhold, D., & Klinglmair, A. 2016. Independent work, modern organizations and entrepreneurial labor: Diversity and hybridity of freelancers and self-employment. *Journal of Management & Organization, 22*: 843 – 858.

Böheim, R., & Taylor, M. 2004. And in the Evening She's a Singer with the Band-Second Jobs, Plight or Pleasure? (ISER Working Paper Series, No. 2004-03). Institute for Social and Economic Research (ISER), University of Essex.

Bouwhuis, S., Garde, A. H., Geuskens, G. A., Boot, C. R., Bongers, P. M., & van der Beek, A. J. 2017. The longitudinal association between multiple job holding and long-term sickness absence among Danish employees: an explorative study using register-based data. *International Archives of Occupational and Environmental Health, 90*: 799 – 807.

Bouwhuis, S., Geuskens, G. A., Boot, C. R., Bongers, P. M., & van der Beek, A. J. 2017. Predictors of transitions from single to multiple job holding: Results of a longitudinal study among employees aged 45‐64 in the Netherlands. *American Journal of Industrial Medicine, 60*: 696 – 710.

Bouwhuis, S., Hoekstra, T., Bongers, P. M., Boot, C. R. L., Geuskens, G. A., & van der Beek, A. J. 2019. Distinguishing groups and exploring health differences among multiple job holders aged 45 years and older. *International Archives of Occupational Environmental Health, 92*: 67 – 79.

Boyd, E. M., Sliter, M. T., & Chatfield, S. 2016. Double trouble: Work—family conflict and well-being for second job holders. *Community, Work & Family, 19*: 462 – 480.

Brunet, J. R. 2008. Blurring the line between public and private sectors: The case of police officers’ off-duty employment. *Public Personnel Management, 37*: 161 – 174.

Bruns, A. 2019. The third shift: Multiple job holding and incarceration of women’s partners. *Social Science Research, 80*: 202 – 215.

Bruns, A., & Pilkauskas, N. 2019. Multiple job holding and mental health among low-income mothers. *Women’s Health Issues*.

Buch, D., & Swanson, M. S. 1986. Moonlighting by psychiatric residents. *Journal of Psychiatric Education, 10*: 247 – 254.

Burmeister-Lamp, K., Lévesque, M., & Schade, C. 2012. Are entrepreneurs influenced by risk attitude, regulatory focus or both? An experiment on entrepreneurs' time allocation. *Journal of Business Venturing, 27*: 456 – 476.

Campion, E. D. 2018. *Motivated to work several jobs: The enrichment and depletion of multiple jobholding*. Unpublished doctoral dissertation, University at Buffalo.

Caza, B. B., Moss, S., & Vough, H. 2018. From synchronizing to harmonizing: The process of authenticating multiple work identities. *Administrative Science Quarterly, 63*: 703 – 745.

Choe, C., Oaxaca, R. L., & Renna, F. 2018. Constrained vs unconstrained labor supply: the economics of dual job holding. *Journal of Population Economics, 31*: 1279 – 1319.

Clinton, M., Totterdell, P., & Wood, S. 2006. A grounded theory of portfolio working. *International Small Business Journal, 24*: 179 – 203.

Conway, K. S., & Kimmel, J. 1998. Male labor supply estimates and the decision to moonlight. *Labour Economics, 5*: 135 – 166.

Demetry, D. 2017. Pop-up to professional: Emerging entrepreneurial identity and evolving vocabularies of motive. *Academy of Management Discoveries, 3*: 187 – 207.

Dempster-McClain, D., & Moen, P. 1989. Moonlighting husbands: A life-cycle perspective. *Work and Occupations, 16*: 43 - 64.

Dickey, H., & Theodossiou, I. 2006. Who has two jobs and why? Evidence from rural coastal communities in west Scotland. *Agricultural Economics, 34*: 291 – 301.

Dickey, H., Watson, V., & Zangelidis, A. 2011. Is it all about money? An examination of the motives behind moonlighting. *Applied Economics, 43*: 3767 – 3774.

Dickey, H., Watson, V., & Zangelidis, A. 2015. What triggers multiple job-holding? A state preference investigation. Discussion Paper No. 15-4. Retrieved from the Centre for European Labour Market Research.

Donnelly, R. 2008. Careers and temporal flexibility in the new economy: an Anglo‐Dutch comparison of the organisation of consultancy work. *Human Resource Management Journal, 18*: 197 – 215.

Doucette, M. H., & Bradford, W. D. 2019. Dual job holding and the gig economy: Allocation of effort across primary and gig jobs. *Southern Economic Journal, 85*: 1217 – 1242.

Duberley, J., Mallon, M., & Cohen, L. 2006. Exploring career transitions: accounting for structure and agency. *Personnel Review, 35*: 281 – 296.

Eggleston, K., & Bir, A. 2006. Physician dual practice. *Health Policy, 78*: 157 – 166.

Feldman, D. C. 1990. Reconceptualizing the nature and consequences of part-time work. *Academy of Management Review, 15*: 103 – 112.

Fenwick, T. J. 2006. Contradictions in portfolio careers: Work design and client relations. *Career Development International, 11*: 65 – 79.

Folta, F. B., Delmar, F., & Wennberg, K. 2010. Hybrid Entrepreneurship. Working Paper No. 825. Retrieved from the Research Institute of Industrial Economics.

Fraser, J., & Gold, M. 2001. ‘Portfolio workers’: Autonomy and control amongst freelance translators. *Work, Employment & Society, 15*: 679 – 697.

Gagliarducci, S., Nannicini, T., & Naticchioni, P. 2010. Moonlighting politicians. *Journal of Public Economics, 94*: 688 – 699.

Godager, G., & Lurås, H. 2009. Dual job holding general practitioners: the effect of patient shortage. *Health Economics, 18*: 1133 – 1145.

Goodwin, B. K., & Mishra, A. K. 2004. Farming efficiency and the determinants of multiple job holding by farm operators. *American Journal of Agricultural Economics, 86*: 722 – 729.

Grant, M. G. 1977. The relationship of moonlighting to job dissatisfaction in police officers. *Journal of Political Science, 5*: 193 – 196.

Gringeri, C. E. 2001. The poverty of hard work: Multiple jobs and low wages in family economies of rural Utah households. *Journal of Sociology and Social Welfare, 28*: 3 – 22.

Gruen, R., Anwar, R., Begum, T., Killingsworth, J. R., & Normand, C. 2002. Dual job holding practitioners in Bangladesh: An exploration. *Social Science & Medicine, 54*: 267 – 279.

Guarigilia, A., & Kim, B.-Y. 2006. The dynamics of moonlighting in Russia. *Economics of Transition, 14*: 1 – 45.

Guariglia, A., & Kim, B. Y. 2004. Earnings uncertainty, precautionary saving, and moonlighting in Russia. *Journal of Population Economics, 17*: 289 – 310.

Guest, D. E., Oakley, P., Clinton, M., & Budjanovcanin, A. 2006. Free or precarious? A comparison of the attitudes of workers in flexible and traditional employment contracts. *Human Resource Management, 16*: 107 – 124.

Guo, F., Restubog, S. L. D., Cui, L., & Choi, Y. 2019. What determines the entrepreneurial success of academics? Navigating multiple social identities in the hybrid career of academic entrepreneurs. *Journal of Vocational Behavior, 112*: 241 – 254.

Hamersma, S., Heinrich, C., & Mueser, P. 2014. Temporary help work: Earnings, wages, and multiple job holding. *Industrial Relations, 53*: 72 – 100.

Hanf, C.-H., Muller, R. A. E. 1974. Multiple job holding and leisure time. *European Review of Agricultural Economics, 2*: 87 – 93.

Hausken, K., & Ncube, M. 2018. Service delivery versus moonlighting: Using data from Kenya, Ugana, Tanzanis and Senegal. *African Development Review, 30*: 219 – 232.

Hennekam, S. 2015. Challenges of older self-employed workers in creative industries: The case of the Netherlands. *Management Decision, 53*: 876 – 891.

Hennekam, S. 2017. Dealing with multiple incompatible work-related identities: The case of artists. *Personnel Review, 46*: 970 – 987.

Hennekam, S., & Bennett, D. 2016. Self-management of work in the creative industries in the Netherlands. *Human Resources Management, 19*: 31 – 41.

Highfill, J. K., Felder, J., & Sattler, E. L. 1995. Multiple worker households and multiple job holding: Rigid vs. flexible hours. *The American Economist, 39*: 40 – 47.

Hirsch, B. T., & Winters, J. V. 2016. Rotation group bias in measure of multiple job holding. *Economics Letters, 147*: 160 – 163.

Hirsch, B. T., Husain, M. M., & Winters, J. V. 2017. The puzzling pattern of multiple job holding across us labor markets. *Southern Economic Journal, 84*: 26 – 51.

Hirsch, B., Husain, M. M., & Winters, J. V. 2016a. The puzzling fixity of multiple job holding across regions and labor markets. Discussion Paper No. 9631. Retrieved from The Institute for the Study of Labor (IZA).

Hirsch, B., Husain, M. M., & Winters, J. V. 2016b. Multiple job holding, local labor markets, and the business cycle. *IZA Journal of Labor Economics, 5*: 4 – 33.

Hlouskova, J., Tsigaris, P., Caplanova, A., & Sivak, R. 2017. A behavioral portfolio approach to multiple job holdings. *Review of Economics of the Household, 15*: 669 – 689.

Hunt, J. C., Hill, C. R., & Kiker, B. F. 1985. The effect of taxation on labour supply: the case of moonlighting. *Applied Economics, 17*: 897 – 905.

Hurka, S., Obholzer, L., & Daniel, W. T. 2018. When time is money: Sideline jobs, ancillary income and legislative effort. *Journal of European Public Policy, 25*: 651 – 669.

Husain, M. M. 2014. Essays on multiple job holding across local labor market. Unpublished doctoral dissertation, Georgia State University.

Inness, M., Barling, J., & Turner, N. 2005. Understanding supervisor-targeted aggression: A within-person, between-jobs design. *Journal of Applied Psychology, 90*: 731 – 739.

Inness, M., Turner, N., Barling, J., & Stride, C. B. 2010. Transformational leadership and employee safety performance: A within-person, between-jobs design. *Journal of Occupational Health Psychology, 15*: 279 – 290.

Isachsen, A. J., & Strøm, S. 1985. The size and growth of the hidden economy in Norway. *Review of Income and Wealth, 31*: 21 – 38.

Jamal, M. 1986. Moonlighting: Personal, social, and organizational consequences. *Human Relations, 39*: 977 – 990.

Jamal, M., & Crawford, R. L. 1981. Shift work related to job attitudes, social participation and withdrawal behavior: A study of nurses and industrial workers. *Personnel Psychology, 34*: 535 – 547.

Jamal, M., Baba, V., & Riviére, R. 1998. Job stress and well-being of moonlighters: The perspective of deprivation or aspiration revisited. *Stress and Health, 14*: 195 – 202.

Joyce, K. 1976. The facts and figures on moonlighting. *Resident & Staff Physician, 22*: 102 – 110.

Kawakami, A. 2019. Multiple job holding as a strategy for skills development. *Japan & The World Economy, 49*: 73 – 83.

Kawakami, A. 2019. Who holds multiple jobs? Empirical analysis of multiple job holding using a Japanese online survey. *Japan Labor Issues, 3*: 34 – 52.

Khibovskaia, E. 1995. Secondary employment as a means of adapting to economic reforms. *Problems of Economic Transition, 38*: 21 – 35.

Kim, S., & Ishikawa, J. 2019. Formal voice mechanisms and portfolio career workers’ prosocial voice in Japan and Korea: the mediating role of managers’ issue-related leadership activities. *Asia Pacific Business Review, 25*: 194 – 226.

Kimmel, J., & Powell, L. M. 1999. Moonlighting trends and related policy issues in Canada and the United States. *Canadian Public Policy*: 207 – 231.

Kimmel, J., & Smith Conway, K. 2001. Who moonlights and why? Evidence from the SIPP. Industrial Relations: *A Journal of Economy and Society, 40*: 89 – 120.

Kisumano, G. M., & Wa-Mbaleka, S. 2017. Moonlight as a growing phenomenon: A case study of a Congolese Christian university. *International Forum, 20*: 237 – 253.

Koch, T., & Obemaier, M. 2014. Blurred lines: German freelance journalists with secondary employment in public relations. *Public Relations Review, 40*: 473 – 482.

Kottwitz, M. U., L., Frank, B. P., & Otto, K. 2017. The more, the better?! Multiple vs. single jobholders’ job satisfaction as a matter of lacked information. *Frontiers in Psychology, 8*: 1 – 11.

Krishnan, P. (1990). The economics of moonlighting: A double self-selection model. *The Review of Economics and Statistics*: 361 – 367.

Kuhn, K. M., & Maleki, A. 2017. Micro-entrepreneurs, dependent contractors, and instaserfs: Understanding online labor platform workforces. *Academy of Management Perspectives, 31*: 183 – 200.

Kumar, K., & Chaturvedi, R. 2017. Work-life balance and job satisfaction from the perspective of multiple job holding women: Comparative analysis of generational cohorts. *International Journal of Advances in Management and Economics, 6*: 32 – 40.

Lakhani, H., & Fugita, S. S. 1993. Reserve/Guard retention: Moonlighting or patriotism? *Military Psychology, 5*: 113 – 125.

Lale, E. 2015. The evolution of multiple jobholding in the U.S. labor market: The complete picture of gross worker flows. Discussion Paper No. 10355. Retrieved from the Institute for the Study of Labor.

Lindstrom, S. 2016. Artists and multiple job holding—Breadwinning work as mediating between bohemian and entrepreneurial identities and behavior. *Nordic Journal of Working Life Studies, 6*: 43 – 58.

Lipinska-Grobelny, A. 2014. Psychological determinants of portfolio workers’ satisfaction with life. *Health Psychology Report, 2*: 280 – 290.

Livanos, I., & Zangelidis, A. 2012. Multiple job-holding among male workers in Greece. *Regional Studies, 46*: 119 – 135.

Livanos, I., & Zangelidis, A. 2013. Unemployment, Labor Market Flexibility, and Absenteeism: A Pan‐European Study. Industrial Relations: *A Journal of Economy and Society, 52*: 492 – 515.

Lundborg, P. 1995. Job amenity and the incidence of double work*. Journal of Economic Behavior & Organization, 26*: 273 – 287.

Maas, E. T., Koehoorn, M., & McLeod, C. B. 2018. Return-to-work for multiple jobholders with a work-related musculoskeletal disorder: A population-based, matched cohort in British Columbia. *PloS one, 13*.

Mallon, M. 1998. The portfolio career: Pushed or pulled to it? *Personnel Review, 27*: 361 – 377.

Mallon, M., & Walton, S. 2005. Career and learning: the ins and the outs of it. *Personnel Review, 34*: 468 – 487.

Martin, J. E., & Sinclair, R. R. 2007. A typology of the part-time workforce: Differences on job attitudes and turnover. *Journal of Occupational and Organizational Psychology, 80*: 301 – 319.

Martinez Jr, A., Western, M., Haynes, M., Tomaszewski, W., & Macarayan, E. 2014. Multiple job holding and income mobility in Indonesia. *Research in Social Stratification and Mobility, 37*: 91 – 104.

Marucci-Wellman, H. R., Lin, T.-C., J. L., Brennan, M. J., & Verma, S. K. 2014a. Differences in time use and activity patterns when adding a second job: Implications for health and safety in the United States. *American Journal of Public Health, 104*: 1488 – 1500.

Marucci-Wellman, H. R., Lin, T.-C., J. L., Brennan, M. J., & Verma, S. K. 2014b. Work in multiple jobs and the risk of injury in the U.S. working population. *American Journal of Public Health, 104*: 134 – 142.

Marucci-Wellman, H. R., Lombardi, D. A., & Willetts, J. L. 2016. Working multiple jobs over a day or a week: Short-term effects on sleep duration. *Chronobiology International, 33*: 630 – 649.

McKenzie, H. 2017. *Secondary employment by Western Australia police officers: Factors influencing multiple jobholding and the relationship to organizational commitment.* Unpublished doctoral dissertation, Edith Cowan University.

Meissner, M. (1971). The long arm of the job: A study of work and leisure. Industrial Relations: *A Journal of Economy and Society, 10*: 239 – 260.

Menger, P.-M. 1999. Artistic labor markets and careers. *Annual Review of Sociology, 25*: 541 – 574.

Menger, P.-M. 2017. Contingent high-skilled work and flexible labor markets. Creative workers and independent contractors cycling between employment and unemployment. *Swiss Journal of Sociology, 43*: 253 – 284.

Miller, G. W., & Sniderman, M. S. 1974. Multijobholding of Wichita public school teachers. *Public Personnel Management*: 392 – 402.

Miller, G. W., Presley, R. W., & Sniderman, M. S. 1973. Multiple jobholding by firemen and policemen compared. *Public Personnel Management, 2*: 283 – 289.

Mott, P. 1965. *Hours of work and moonlighting*. (In C. E. Dankert, F. C. Mann, & H. R. Northrup, Eds.). Hours of Work (pp. 76 – 94). New York City, NY: Harper & Row.

Nelson, M. K. 1999. Between paid and unpaid work: Gender patterns in supplemental economic activities among white, rural families. *Gender & Society, 13*: 518 – 539.

Nordström, C., Sirén, C. A., Thorgren, S., & Wincent, J. 2016. Passion in hybrid entrepreneurship: the impact of entrepreneurial teams and tenure. *Baltic Journal of Management, 11*: 167 – 186.

Nunoo, J., Darfor, K. N., Koomson, I., & Arthur, A. 2016. Employment security and workers’ moonlighting behavior in Ghana. *Journal of Economic Studies, 45*: 144 – 155.

Nuthalapaty, F. S., Jackson, J. R., & Owen, J. 2004. The influence of quality-of-life, academic, and workplace factors on residency program selection. *Academic Medicine, 79*: 417 – 425.

O'Connell, J. F. 1979. Multiple job holding and marginal tax rates. *National Tax Journal, 32*: 73 – 76.

Olgunde, A. O., Akindele, R. I., & Akande, W. O. 2013. Moonlighting among university lecturers and their performance in the South-Western Nigeria. *Journal of Management and Sustainability, 3*: 92 – 102.

Osborne, R., & Warren, J. 2006. Multiple job holding—A working option for young people. *Labor, Employment and Work in New Zealand*: 377 – 384.

Panos, G., Pouliakas, K., Zangelidis, A. 2009. The inter-related dynamics of dual job holding, human capital and occupational choice. IZA Discussion Paper No. 4437, Institute for the Study of Labor (IZA).

Panos, G., Pouliakas, K., Zangelidis, A. 2014. Multiple job holding, skill diversification, and mobility. *Industrial Relations, 53*: 223 – 272.

Partridge, M. 2002. Moonlighting in a High Growth Economy: Evidence from US State‐Level Data. *Growth and Change, 33*: 424 – 452.

Paxson, C. H., & Sicherman, N. 1996. The dynamics of dual job holding and job mobility. *Journal of Labor Economics, 14*: 357 – 393.

Pearson, C., Carroll, D., & Hall, B. W. 1994. Analysis of demographic, perceptual, and work-related factors in teacher moonlighting. *The Journal of Educational Research, 87*: 304 – 308.

Perlman, R. 1966. Observations on overtime and moonlighting. *Southern Economic Journal*: 237 – 244.

Perlman, R. 1968. Moonlighting and Labor Supply: Reply. *Southern Economic Journal*: 82 – 84.

Pouliakas, K. 2017. Multiple job-holding: Career pathway or dire straits? IZA World of Labor.

Raeder, S. 2018. Psychological Contracts of Multiple Jobholders: A Multilevel Analysis. *SAGE Open, 8*: 357 – 393.

Raffel, J. A., & Groff, L. R. 1990. Shedding light on the dark side of teacher moonlighting. *Educational Evaluation and Policy Analysis, 12*: 403 – 414.

Raffiee, J., & Feng, J. 2014. Should I quit my day job?: A hybrid path to entrepreneurship. *Academy of Management Journal, 57*: 936 – 963.

Reilly, B., & Krstić, G. 2003. Employees and second‐job holding in the Federal Republic of Yugoslavia. *Economics of Transition, 11*: 93 – 122.

Renna, F. 2006. Moonlighting and overtime: a cross-country analysis. *Journal of Labor Research, 27:* 575 – 591.

Renna, F., & Oaxaca, R. L. 2006. The economics of dual jobholding: A job portfolio model of labor supply. IZA Discussion Paper No. 1915, Institute for the Study of Labor (IZA).

Robertson, N., Perkins, H. C., & Taylor, N. 2008. Multiple job holding: interpreting economic, labour market and social change in rural communities. *Sociologia Ruralis, 48*: 331 – 350.

Robinson, H., & Wadsworth, J. 2007. Impact of the minimum wage on the incidence of second job holding in Britain. *Scottish Journal of Political Economy, 54*: 553 – 574.

Robinson, L. A., Osborne, L. M., Hsu, A. J., Park, H., & Arbuckle, M. R. 2019. Moonlighting by psychiatry residents: A survey of residents and training directors. *Academic Psychiatry, 43*: 46 – 50.

Ruedrich, S., Matthews, K., Chan, C., & Mohl, P. 1994. Psychiatric Resident Moonlighting. *Academic Psychiatry, 18*: 189 – 196.

Russo, G., Fronteira, I., Jesus, T. S., & Buchan, J. 2018. Understanding nurses’ dual practice: a scoping review of what we know and what we still need to ask on nurses holding multiple jobs. *Human Resources for Health, 16*: 14 – 30.

Santangelo, S., & Lester, D. 1985. Correlates of job satisfaction of public school teachers: Moonlighting, locus of control, and stress. *Psychological Reports, 56*: 130.

Sappa, V., Boldrini, E., & Aprea, C. 2015. Combining teaching with another job: a possible resource to face professional challenges. Preliminary findings from a Swiss study in vocational education and training. *Empirical Research in Vocational Education and Training, 7*: 13 – 36.

Schaubroeck, J., Judge, T. A., & Taylor, L. A. 1998. Influences of trait negative affect and situational similarity on correlation and convergence of work attitudes and job stress perceptions across two jobs. *Journal of Management, 24*: 553 – 576.

Schulz, M., Urbig, D., & Procher, V. 2016. Hybrid entrepreneurship and public policy: The case of firm entry deregulation. *Journal of Business Venturing, 31*: 272 – 286.

Schulz, M., Urbig, D., & Procher, V. 2017. The role of hybrid entrepreneurship in explaining multiple job holders’ earnings structure. *Journal of Business Venturing Insights, 7*: 9 – 14.

Sherman, R., & Willett, T. D. 1968. Notes on overtime, moonlighting, and the shorter work week. *Southern Economic Journal*: 78 – 82.

Shishko, R., & Rostker, B. 1976. The economics of multiple job holding. *American Economic Review, 66*: 298 – 308.

Sinclair, R. R., Martin, J. E., & Michel, R. P. 1999. Full-time and part-time subgroup differences in job attitudes and demographic characteristics. *Journal of Vocational Behavior, 55*: 337 – 357.

Sliter, M. T., & Boyd, E. M. 2014. Two (or three) is not equal to one: Multiple jobholding as a neglected topic in organizational research. *Journal of Organizational Behavior, 35*: 1042 – 1046.

Smith, D. M., & Cooper, B. 1967. A study of moonlighting by public school teachers. *American Educational Research Journal, 4*: 51 – 58.

Socha, K. Z., & Bech, M. 2011. Physician dual practice: A review of literature. *Health Policy, 102*: 1 – 7.

Socha, K., & Bech, M. 2012. Dual practitioners are as engaged in their primary job as their senior colleagues. *Danish Medical Journal, 59*: 1 – 63.

Solesvik, M. Z. 2017. Hybrid entrepreneurship: how and why entrepreneurs combine employment with self-employment. *Technology Innovation Management Review, 7*: 33 – 41.

Sundbo, J. 1997. The creation of service markets to solve political-sociological problems: The Danish Home Service. *Service Industries Journal, 17*: 580 – 602.

Taylor, N., Baines, J., & Newell, J. 2016. The potential influence of multiple job holding on official statistics describing the rural workforce: Issues for data series and workforce policy. Presented at the Annual Conference of the New Zealand Agricultural and Resource Economics Society.

Thorgren, S., Siren, C., Nordstrom, C., & Wincent, J. 2016. Hybrid entrepreneurs’ second-step choice: The nonlinear relationship between age and intention to enter full-time entrepreneurship. *Journal of Business Venturing Insights, 5*: 14 – 18.

Throsby, D., & Zednik, A. 2011. Multiple job-holding and artistic careers: Some empirical evidence. *Cultural Trends, 20*: 9 – 24.

Timothy, V. L., & Nkwama, S. 2017. Moonlighting among teachers in urban Tanzania: A survey of public primary schools in Ilala District. *Cogent Education, 4*: 1 – 8.

Totterdell, P., Wood, S., & Wall, T. 2006. An intra-individual test of the demands-control model: A weekly diary study of psychological strain in portfolio workers. *Journal of Occupational and Organizational Psychology, 79*: 63 – 84.

Urwick, J., & Kisa, S. 2014. Science teacher shortage and the moonlighting culture: The pathology of the teacher labour market in Uganda. *International Journal of Educational Development, 36*: 72-80.

van den Born, A., & van Witteloostuijn, A. 2013. Drivers of freelance career success. *Journal of Organizational Behavior, 34*: 24 – 46.

Van der Gaag, J., Stelcner, M., & Vijverberg, W. 1989. Wage differentials and moonlighting by civil servants: Evidence from Côte d'Ivoire and Peru. *The World Bank Economic Review, 3*: 67 – 95.

Viljamaa, A., & Varamäki, E. 2015. Do persistent and transitory hybrid entrepreneurs differ. International *Journal of Social, Behavioral, Educational, Economic, Business and Industrial Engineering, 9*: 936 – 940.

Viljamaa, A., Varamäki, E., & Joensuu-Salo, S. 2017. Best of both worlds? Persistent hybrid entrepreneurship. *Journal of Enterprising Culture, 25*: 339 – 359.

Waldo, A. D. 1965. The impact of outmigration and multiple jobholding upon income distribution in agriculture. *Journal of Farm Economics, 47*: 1235 – 1244.

Walsh, G., Dahling, J. J., Schaarschmidt, M., & Brach, S. 2016. Surface-acting outcomes among service employees with two jobs: Investigating moderation and mediation effects. *Journal of Service Management, 27*: 534 – 562.

Walsh, W. F. 1986. Patrol officer arrest rates: A study of the social organization of police work. *Justice Quarterly, 3*: 271 – 290.

Webster, B. D., & Edwards, B. D. 2019. Does holding a second job viewed as a calling impact one’s work at the primary job? *Journal of Vocational Behavior*.

Webster, B. D., Edwards, B. D., & Smith, M. 2018. Is holding two jobs too much? An examination of dual jobholders. *Journal of Business and Psychology*: 1 – 15.

Weinrauch, J. D. 1982. Starting a part-time small business. *Journal of Small Business Management, 20*: 42 – 48.

Wijayanti, N. D., & Adrison, V. 2018. Effect of wages on multiple job holding decisions in Indonesia: Evidence from the Indonesian family life survey (IFLS) data of 2007 and 2014. *Journal of Indonesian Economy and Business, 33*: 1 – 22.

Wilensky, H. L. 1963. The moonlighter: A product of relative deprivation. Industrial Relations: *A Journal of Economy and Society, 3*: 105 – 124.

Winters, J. V. 2010. Teaching moonlighting: Evidence from the U.S. Current Population Survey. *Applied Economics Letters, 17*: 1111 – 1114.

Wittmar, J. L. S., & Martin, J. E. 2011. Effects of scheduling perceptions on attitudes and mobility in different part-time employee types. *Journal of Vocational Behavior, 78*: 149 – 158.

Wood, S. J., & Michaelides, G. 2016. Challenge and hindrance stressors and wellbeing-based work–nonwork interference: A diary study of portfolio workers. *Human Relations, 69*: 111 – 138.

Wood, S., Michaelides, G., & Totterdell, P. 2013. The impact of fluctuating workloads on well-being and the mediating role of work− nonwork interference in this relationship. *Journal of Occupational Health Psychology, 18*: 106 – 119.

Wu, Z., Baimbridge, M., & Zhu, Y. 2009. Multiple job holding in the United Kingdom: Evidence from the British Household Panel Survey. *Applied Economics, 41*: 2751 – 2766.

Xi, G., Block, J. H., Lasch, F., Robert, F., & Thurik, R. (2017). Mode of entry into hybrid entrepreneurship: New venture start-up versus business takeover. *International Review of Entrepreneurship, 16*: 217 – 240.

Zickar, M. J., Gibby, R. E., & Jenny, T. 2004. Job attitudes of workers with two jobs. *Journal of Vocational Behavior, 64*: 222 – 235.
